# Supplementary material
Source: publisher figshare collection journal article supplement (https://acs.figshare.com/ndownloader/files/6994487)
Supplement: Supplementary file 1 [file 6994487]

Supporting Information for:  
**Photophysical Properties and Electronic Structure of Porphyrins  
 Bearing Zero to Four *meso*-Phenyl Substituents:  
 New Insights into Seemingly Well Understood Tetrapyrroles**

Amit Kumar Mandal,<sup>†</sup> Masahiko Taniguchi,<sup>#</sup> James R. Diers,<sup>§</sup> Dariusz M. Niedzwiedzki,<sup>†,‡</sup>  
 Christine Kirmaier,<sup>†</sup> Jonathan S. Lindsey,<sup>\*,#</sup> David F. Bocian,<sup>\*,§</sup> and Dewey Holten,<sup>\*,†</sup>

<sup>†</sup> Department of Chemistry, Washington University, St. Louis, MO 63130-4889

<sup>#</sup> Department of Chemistry, North Carolina State University, Raleigh, NC 27695-8204

<sup>§</sup> Department of Chemistry, University of California, Riverside, CA 92521-0403

<sup>‡</sup> Photosynthetic Antenna Research Center, Washington University, St. Louis, MO 63130-4889

### Table of Contents

| Topic                                                | Page |
|------------------------------------------------------|------|
| 1. Complete citation for one truncated reference     | S1   |
| 2. Synthesis results                                 | S1   |
| 3. Synthesis experimental section                    | S3   |
| 4. MO properties of porphyrins from DFT calculations | S4   |

#### 1. Complete citation for one truncated reference

- (26) Frisch, M. J.; Trucks, G. W.; Schlegel, H. B.; Scuseria, G. E.; Robb, M. A.; Cheeseman, J. R.; Scalmani, G.; Barone, V.; Mennucci, B.; Petersson, G. A.; Nakatsuji, H.; Caricato, M.; Li, X.; Hratchian, H. P.; Izmaylov, A. F.; Bloino, J.; Zheng, G.; Sonnenberg, J. L.; Hada, M.; Ehara, M.; Toyota, K.; Fukuda, R.; Hasegawa, J.; Ishida, M.; Nakajima, T.; Honda, Y.; Kitao, O.; Nakai, H.; Vreven, T.; Montgomery, J. A., Jr.; Peralta, J. E.; Ogliaro, F.; Bearpark, M.; Heyd, J. J.; Brothers, E.; Kudin, K. N.; Staroverov, V. N.; Kobayashi, R.; Normand, J.; Raghavachari, K.; Rendell, A.; Burant, J. C.; Iyengar, S. S.; Tomasi, J.; Cossi, M.; Rega, N.; Millam, J. M.; Klene, M.; Knox, J. E.; Cross, J. B.; Bakken, V.; Adamo, C.; Jaramillo, J.; Gomperts, R.; Stratmann, R. E.; Yazyev, O.; Austin, A. J.; Cammi, R.; Pomelli, C.; Ochterski, J. W.; Martin, R. L.; Morokuma, K.; Zakrzewski, V. G.; Voth, G. A.; Salvador, P.; Dannenberg, J. J.; Dapprich, S.; Daniels, A. D.; Farkas, Ö.; Foresman, J. B.; Ortiz, J. V.; Cioslowski, J.; Fox, D. J. Gaussian, Inc., Wallingford CT, 2009.

#### 2. Synthesis results

5-Phenylporphyrin (**H<sub>2</sub>P-1**) was first reported by Therien and co-workers who carried out studies of absorption, fluorescence, and EPR spectroscopy, but without delineation of synthetic procedures.<sup>14</sup> Later, Senge and co-workers synthesized **H<sub>2</sub>P-1** via three different approaches; (a) [2 + 1 + 1] mixed condensation reaction of benzaldehyde, pyrrole-2-carboxaldehyde, and dipyrromethane, (b) [3+1] mixed condensation reaction of 5,10-diphenyltripyrane, pyrrole, and benzaldehyde (as a result of scrambling), (c) nucleophilic substitution of porphine.<sup>15</sup> In each case, the reaction resulted mixture of porphyrins requiring elaborate purifications. Here, the [2 + 2] condensation<sup>20</sup> of 1,9-bis(*N,N*-dimethylaminomethyl)-5-phenyldipyrromethane (**1**)<sup>20</sup> and dipyrromethane (**2**)<sup>10</sup> upon treatment with zinc acetate in refluxing ethanol followed by oxidation

with DDQ afforded 5-phenylporphyrin (**ZnP-1**) in 13% yield (Scheme S1, panel A). Demetalation of **ZnP-1** afforded **H<sub>2</sub>P-1**.

Synthesis of 5,10-diphenylporphyrin (**H<sub>2</sub>P-2c**) was first described by Briñas and Brückner via [2 + 2] condensation of 1-benzoyl-5-phenyl-9-formyldipyrromethane and dipyrromethane.<sup>16</sup> **H<sub>2</sub>P-2c** was also prepared via two methods [described above as routes (b) and (c)].<sup>15</sup> The former method by Briñas and Brückner requires elaborate precursor preparation, while latter methods by Senge and co-workers require chromatographic separation of porphyrins. Here, we carried out a [3 + 1] condensation of 5,10-diphenyltripyrane (**3**)<sup>9</sup> + 2,5-diformylpyrrole (**4**)<sup>21</sup> (Scheme S1, panel B). The reaction conditions were applied from established methods for the synthesis of meso-substituted magnesium porphyrins by [2 + 2] condensation of two 1-acyldipyrromethanes (identical or non-identical) under basic condition (in the presence of DBU), where magnesium bromide serves as a template to facilitate porphyrinic macrocycle formation.<sup>22</sup> The intermediate porphyrin **MgP-2c** was formed (not isolated) without detectable scrambling upon analysis of the crude reaction mixture by MALDI-MS. Treatment of the reaction mixture with TFA demetalated **MgP-2c** to give the desired free base porphyrin **H<sub>2</sub>P-2c**. The drawback of this method was a low yield (2%) was offset by the ready availability of the starting materials and the absence of a mixture of porphyrins.

5,10,15-Triphenylporphyrin (**H<sub>2</sub>P-3**) was first prepared upon nucleophilic substitution of 5,10-diphenylporphyrin (**H<sub>2</sub>P-2t**) by Senge and co-workers.<sup>17</sup> We previously carried out the preparation of zinc(II) 5,10,15-triphenylporphyrin **ZnP-3** by standard [2 + 2] condensation of a 1,9-dibenzoyldipyrromethane + a dipyrromethane, followed by zinc metalation.<sup>19</sup> Here, demetalation of **ZnP-3** with TFA afforded **H<sub>2</sub>P-3** in 63% (Scheme S1, panel C).

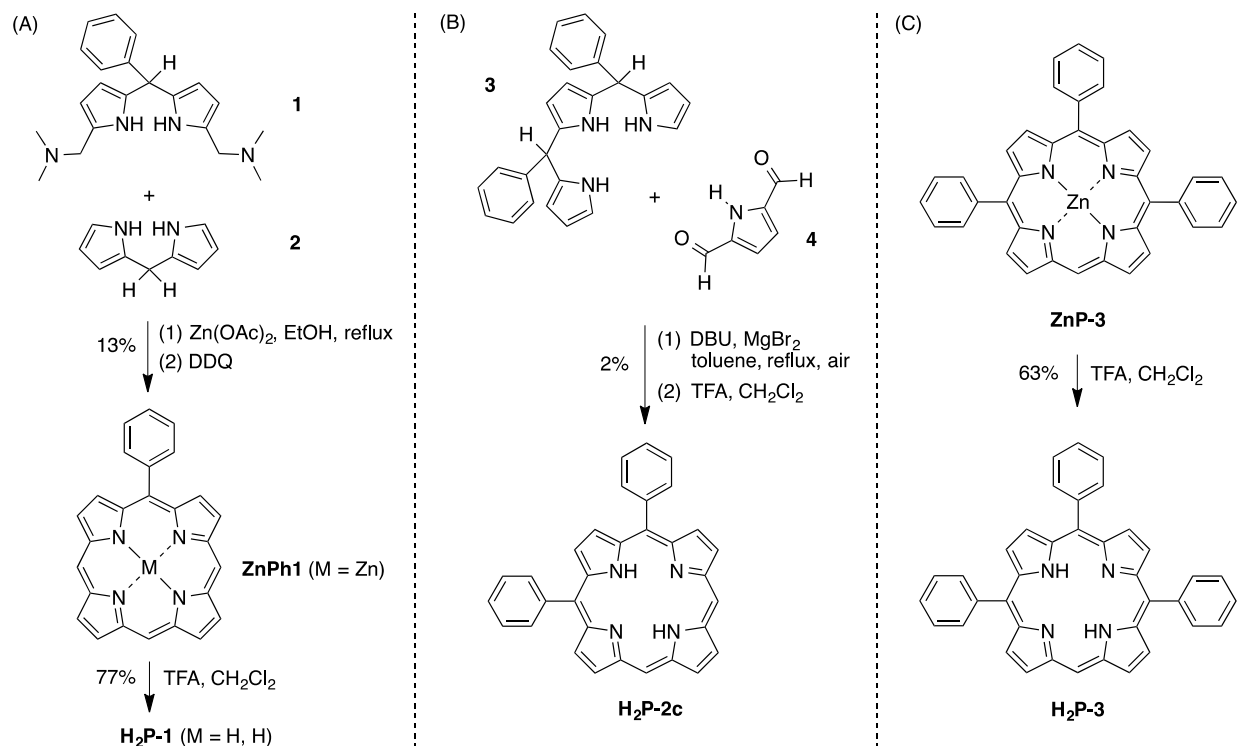

**Scheme S1.** Synthesis of phenylporphyrins.

### 3. Synthesis experimental section

**Zn(II)-5-Phenylporphyrin (ZnP-1).** Following a standard procedure for the synthesis of mono-*meso*-substituted-porphyrins,<sup>20</sup> a solution of 1,9-bis(*N,N*-dimethylaminomethyl)-5-phenyldipyrrromethane<sup>20</sup> (**1**, 84.1 mg, 0.250 mmol) and dipyrrromethane<sup>10</sup> (**2**, 36.5 mg, 0.250 mmol) in ethanol (25 mL) at room temperature was treated with Zn(OAc)<sub>2</sub> (459 mg, 2.50 mmol). The mixture was heated to reflux. After 2 h, the reaction mixture was allowed to cool to room temperature. A sample of 2,3-dichloro-5,6-dicyano-1,4-benzoquinone (DDQ, 170 mg, 0.75 mmol) was added, and the mixture was stirred for 15 min. Triethylamine (175  $\mu$ L, 1.25 mmol) was added, and the reaction mixture was concentrated to dryness. Column chromatography [silica, hexanes/CH<sub>2</sub>Cl<sub>2</sub> (1:1)] afforded a red solid (14.8 mg, 13%): <sup>1</sup>H NMR (300 MHz, THF-*d*<sub>8</sub>)  $\delta$  7.75–7.82 (m, 3H), 8.21–8.29 (m, 2H), 9.05 (d, *J* = 4.3 Hz, 2H), 9.44 (d, *J* = 4.3 Hz, 2H), 9.50–9.55 (m, 4H), 10.29 (s, 1H), 10.31 (s, 2H); ESI-MS obsd *m/z* = 449.07392, calcd 449.07333 [(M + H)<sup>+</sup>, M = C<sub>26</sub>H<sub>16</sub>N<sub>4</sub>Zn];  $\lambda_{\text{abs}}$  (toluene) 406 (100), 532 (4.7), 565 (1.0) nm;  $\lambda_{\text{ems}}$  (toluene) 568, 623 nm,  $\Phi_{\text{f}}$  = 0.034.

**5-Phenylporphyrin (H<sub>2</sub>P-1).** A solution of **ZnP-1** (11.2 mg, 0.0250 mmol) in anhydrous CH<sub>2</sub>Cl<sub>2</sub> (10 mL) was treated with TFA (190  $\mu$ L, 2.50 mmol) at room temperature for 16 h. The reaction mixture was quenched by the addition of 10% aqueous NaHCO<sub>3</sub> (10 mL), and then extracted with CH<sub>2</sub>Cl<sub>2</sub>. The organic extract was washed with water, dried (Na<sub>2</sub>SO<sub>4</sub>), and filtered. The filtrate was concentrated. Column chromatography [silica, hexanes/CH<sub>2</sub>Cl<sub>2</sub> (1:1)] afforded a purple solid (7.4 mg, 77%): <sup>1</sup>H NMR (300 MHz, THF-*d*<sub>8</sub>)  $\delta$  –3.61 to –3.46 (br, 2H), 7.78–7.86 (m, 3H), 8.22–8.30 (m, 2H), 9.05 (d, *J* = 4.7 Hz, 2H), 9.46 (d, *J* = 4.7 Hz, 2H), 9.50–9.57 (m, 4H), 10.33 (s, 1H), 10.40 (s, 2H); ESI-MS obsd *m/z* = 387.16084, calcd 387.16042 [(M + H)<sup>+</sup>, M = C<sub>26</sub>H<sub>18</sub>N<sub>4</sub>];  $\lambda_{\text{abs}}$  (toluene) 402 (100), 496 (5.7), 527 (0.8), 569 (1.8) nm;  $\lambda_{\text{ems}}$  (toluene) 626, 692 nm.

**5,10-Diphenylporphyrin (H<sub>2</sub>P-2c).** Following a procedure for synthesis of *cis*-AB-porphyrins,<sup>22</sup> a solution of 5,10-diphenyltripyrane<sup>9</sup> (**3**, 94.4 mg, 0.250 mmol) and 2,5-diformylpyrrole<sup>21</sup> (**4**, 30.8 mg, 0.250 mmol) in toluene (2.5 mL) was treated with 1,8-diazabicyclo[5.4.0]undec-7-ene (DBU, 375  $\mu$ L, 2.50 mmol) and anhydrous MgBr<sub>2</sub> (138 mg, 0.750 mmol) at reflux for 16 h. The MALDI-MS analysis of the crude reaction mixture indicated the formation of magnesium(II) 5,10-diphenylporphyrin [**MgP-2c**, *m/z* = 484.0, calcd 484.2 (M = C<sub>32</sub>H<sub>20</sub>N<sub>4</sub>Mg)]. The reaction mixture was concentrated under vacuum, then treated with anhydrous CH<sub>2</sub>Cl<sub>2</sub> (5 mL) and TFA (100  $\mu$ L) at room temperature for 15 min. The reaction mixture was quenched by the addition of 10% aqueous NaHCO<sub>3</sub> (10 mL), and then extracted with CH<sub>2</sub>Cl<sub>2</sub>. The organic extract was washed with water, dried (Na<sub>2</sub>SO<sub>4</sub>), and filtered. The filtrate was concentrated. Column chromatography [silica, hexanes/CH<sub>2</sub>Cl<sub>2</sub> (1:1)] afforded a purple solid (1.9 mg, 2%): <sup>1</sup>H NMR (300 MHz, THF-*d*<sub>8</sub>)  $\delta$  –3.31 to –3.27 (br, 2H), 7.74–7.83 (m, 6H), 8.19–8.28 (m, 4H), 8.89 (s, 2H), 8.98 (d, *J* = 4.7 Hz, 2H), 9.42 (d, *J* = 4.7 Hz, 2H), 9.52 (s, 2H), 10.34 (s, 2H); ESI-MS obsd *m/z* = 463.19238, calcd 463.19172 [(M + H)<sup>+</sup>, M = C<sub>32</sub>H<sub>22</sub>N<sub>4</sub>];  $\lambda_{\text{abs}}$  (toluene) 408 (100), 502 (5.4), 532 (0.7), 577 (1.5) nm;  $\lambda_{\text{ems}}$  (toluene) 635, 700 nm.

**5,10,15-Triphenylporphyrin (H<sub>2</sub>P-3).** A solution of **ZnP-3** (6.0 mg, 0.010 mmol) in anhydrous CH<sub>2</sub>Cl<sub>2</sub> (5 mL) was treated with TFA (77  $\mu$ L, 1.0 mmol) at room temperature for 12 h. The reaction mixture was quenched by the addition of 10% aqueous NaHCO<sub>3</sub> (10 mL), and then extracted with CH<sub>2</sub>Cl<sub>2</sub>. The organic extract was washed with water, dried (Na<sub>2</sub>SO<sub>4</sub>), and filtered. The filtrate was concentrated. Column chromatography [silica, hexanes/CH<sub>2</sub>Cl<sub>2</sub> (1:1)] afforded a purple solid (3.4 mg, 63%): <sup>1</sup>H NMR (300 MHz, THF-*d*<sub>8</sub>)  $\delta$  –2.95 to –2.91 (br, 2H),

7.71–7.85 (m, 9H), 8.19–8.29 (m, 6H), 8.81–8.90 (m, 4H), 8.98 (d,  $J = 4.7$  Hz, 2H), 9.41 (d,  $J = 4.7$  Hz, 2H), 10.32 (s, 1H); ESI-MS obsd  $m/z = 539.22329$ , calcd 539.22302  $[(M + H)^+]$ ,  $M = C_{38}H_{26}N_4$ ;  $\lambda_{abs}$  (toluene) 414 (100), 508 (4.8), 542 (1.4), 584 (1.4), 639 (0.6) nm;  $\lambda_{ems}$  (toluene) 643, 709 nm.

#### 4. MO properties of porphyrins from DFT calculations

**Table S1.** MO properties of porphyrins from DFT calculations (eV).<sup>a</sup>

| Cmpd                                   | H-1    | H      | L      | L+1    |  | L – H | (L+1) – (H-1) | L – (H-1) | (L+1) – H |  | $\Delta E_{avg}$ | $\Delta E_{dif1}$ | $\Delta E_{dif2}$ |
|----------------------------------------|--------|--------|--------|--------|--|-------|---------------|-----------|-----------|--|------------------|-------------------|-------------------|
| <b>H<sub>2</sub>P-0</b>                | -7.059 | -7.006 | -1.290 | -1.288 |  | 5.72  | 5.77          | 5.77      | 5.72      |  | 5.74             | 0.06              | 0.05              |
| <b>H<sub>2</sub>P-1</b>                | -7.055 | -6.938 | -1.315 | -1.280 |  | 5.62  | 5.77          | 5.74      | 5.66      |  | 5.70             | 0.15              | 0.08              |
| <b>H<sub>2</sub>P-2c</b> <sup>b</sup>  | -7.046 | -6.897 | -1.307 | -1.301 |  | 5.59  | 5.74          | 5.74      | 5.60      |  | 5.67             | 0.15              | 0.14              |
| <b>H<sub>2</sub>P-2c'</b> <sup>c</sup> | -7.047 | -6.895 | -1.306 | -1.303 |  | 5.59  | 5.74          | 5.74      | 5.59      |  | 5.67             | 0.15              | 0.15              |
| <b>H<sub>2</sub>P-2t</b>               | -7.055 | -6.867 | -1.343 | -1.277 |  | 5.52  | 5.78          | 5.71      | 5.59      |  | 5.65             | 0.25              | 0.12              |
| <b>H<sub>2</sub>P-3</b>                | -7.043 | -6.818 | -1.332 | -1.300 |  | 5.49  | 5.74          | 5.71      | 5.52      |  | 5.61             | 0.26              | 0.19              |
| <b>H<sub>2</sub>P-4</b>                | -7.034 | -6.790 | -1.324 | -1.318 |  | 5.47  | 5.72          | 5.71      | 5.47      |  | 5.59             | 0.25              | 0.24              |

<sup>a</sup> DFT calculations were performed for the structures shown in Chart 2 in toluene. The MOs are abbreviated as HOMO–1 (H–1), HOMO (H), LUMO (L), and LUMO+1 (L+1). The last three columns are defined for use in the four-orbital model as follows:  $\Delta E_{avg} = [(E_L - E_H) + (E_{L+1} - E_{H-1})]/2 = [(E_{L+1} - E_H) + (E_L - E_{H-1})]/2$ ;  $\Delta E_{dif1} = (E_{L+1} - E_{H-1}) - (E_L - E_H)$ ;  $\Delta E_{dif2} = (E_L - E_{H-1}) - (E_{L+1} - E_H)$ .

<sup>b</sup> The 5,10-diphenyl rings do not encompass the proton axis (see Figure 9).

<sup>c</sup> The 5,10-diphenyl rings encompass the proton axis (see Figure 9).
